# Supplementary material for: Protein assembly mediated by sulfonatocalix[4]arene
Source: Royal Society of Chemistry journal article supplement (doi:10.1039/c4cc04897k), 2014-01-01
Supplement: c4cc04897k1.pdf [file c4cc04897k1.pdf]

*ELECTRONIC SUPPLEMENTARY INFORMATION*

**Protein Assembly Mediated by Sulfonatocalix[4]arene**

Róise E. McGovern,<sup>a</sup> Andrew A. McCarthy,<sup>b</sup> and Peter B. Crowley<sup>\*a</sup>

<sup>a</sup>School of Chemistry, National University of Ireland Galway, Ireland

<sup>b</sup>European Molecular Biology Laboratory, Unit of Virus Host-Cell Interactions, UJF-EMBL-CNRS, Grenoble Outstation, 6 rue Jules Horowitz, 38042 Grenoble Cedex 9, France

\*Correspondence to: peter.crowley@nuigalway.ie, +353 91 49 24 80

## Methods

**Co-crystallization of lysozyme and sclx<sub>4</sub>.** Hen white egg lysozyme (62971 Fluka) was purchased from Sigma-Aldrich and used without further purification. The hanging drop vapour diffusion method was used for crystallization at 20° C. Co-crystals of lysozyme and sclx<sub>4</sub> were grown from identical conditions to those reported for cytochrome *c*<sup>1</sup> except that an oil barrier was not used. Drops were prepared by combining 1 µL volumes of lysozyme (1.4 mM), sclx<sub>4</sub> (17 mM) and the reservoir solution (20-30 % polyethylene glycol (PEG) 8000, 50 mM NaCl, 100 mM MgCl<sub>2</sub> and 50 mM sodium cacodylate pH 6.3). Premixing the protein and ligand was not possible as this resulted in complete precipitation.

**X-ray Diffraction and Structure Determination.** Crystals were transferred to reservoir solution supplemented with 25 % glycerol and flash-frozen under a stream of nitrogen gas at 100 K (X-stream 2000). Diffraction data were collected from a single crystal of the lysozyme:sclx<sub>4</sub> complex at Soleil (PROXIMA 1, Pilatus 6M detector,  $\phi$  scans of 0.1° over 180° to a resolution of 1.72 Å). Data processing and scaling were performed in MOSFLM<sup>2</sup> and SCALA,<sup>3</sup> respectively. The data collection and refinement statistics are given in Table S1. The structure was solved by molecular replacement in PHASER.<sup>4</sup> Refinement and manual rebuilding were performed in REFMAC5 as implemented in CCP4<sup>5</sup> and COOT,<sup>6</sup> respectively. Solvent molecules were placed automatically using ARP/wARP<sup>7</sup> and refinement was continued until no features remained in the  $F_o - F_c$  difference maps. Molprobity<sup>8</sup> was used to check the structure quality. Coordinates and structure factors were deposited in the Protein Data Bank with the accession code 4PRQ. The protein-ligand and protein-protein interfaces were analysed in COOT and PISA.<sup>9</sup> Interface areas [the inaccessible surface (Å<sup>2</sup>) of the protein or ligand in the complex] were calculated as described previously.<sup>1</sup>

**Arginine solvent accessibility in lysozyme.** 15 high resolution (0.9-2.1 Å) crystal structures of hen egg white lysozyme were analyzed using the Accessible Surface Areas calculation in CCP4.<sup>4</sup> Each file (PDB codes: 194L, 1GWD, 1JIS, 1LPI, 1YIK, 2CDS, 2D4K, 2FBB, 2I25, 2ZQ3, 3A67, 3AGH, 3AW7, 3LZT, 4J1A) was manually edited to contain a single copy of lysozyme. Other proteins, water molecules, ions and alternate conformations were removed prior to the calculations.

**Table S1.** Summary of crystallization conditions, data collection and refinement statistics

| <i>Crystallization Conditions<sup>a</sup></i>               |                                      |
|-------------------------------------------------------------|--------------------------------------|
| [protein], [sclx <sub>4</sub> ] (mM)                        | 1.4, 17                              |
| PEG 8,000 (%)                                               | 24                                   |
| Buffer, (CH <sub>3</sub> ) <sub>2</sub> AsO <sub>2</sub> Na | 0.05 M, pH 6.3                       |
| Salts                                                       | 0.05 M NaCl, 0.1 M MgCl <sub>2</sub> |
| <i>Data Collection<sup>b</sup></i>                          |                                      |
| Space group                                                 | <i>P</i> 2 <sub>1</sub>              |
|                                                             | <i>a</i> = 44.01 Å                   |
|                                                             | <i>b</i> = 81.75 Å                   |
| Cell constants                                              | <i>c</i> = 72.10 Å                   |
|                                                             | <i>α</i> = <i>γ</i> = 90°            |
|                                                             | <i>β</i> = 105.37°                   |
| Resolution (Å)                                              | 81.75-1.72 (1.77-1.72)               |
| Wavelength (Å)                                              | 1.00792                              |
| Unique reflections                                          | 1386759 (51142)                      |
| Multiplicity                                                | 3.0 (2.6)                            |
| <i>I</i> / <i>σ</i>                                         | 9.4 (1.8)                            |
| Completeness (%)                                            | 98.7 (94.9)                          |
| <i>R</i> <sub>merge</sub> <sup>c</sup> (%)                  | 7.3 (55.6)                           |
| Solvent content (%)                                         | 43.86                                |
| <i>Refinement</i>                                           |                                      |
| <i>R</i> <sub>factor</sub> (%)                              | 18.48                                |
| <i>R</i> <sub>free</sub> (%)                                | 22.42                                |
| rmsd <sup>d</sup> bonds (Å)                                 | 0.01                                 |
| rmsd angles (°)                                             | 1.12                                 |
| # molecules in asymmetric unit                              |                                      |
| Protein                                                     | 4                                    |
| sclx <sub>4</sub>                                           | 5                                    |
| PEG                                                         | 5                                    |
| Mg <sup>2+</sup>                                            | 3                                    |
| Solvent                                                     | 322                                  |
| Average <i>B</i> factors <sup>e</sup> (Å <sup>2</sup> )     |                                      |
| Protein                                                     | 21.51                                |
| sclx <sub>4</sub>                                           | 19.70                                |
| PEG                                                         | 45.46                                |
| Mg <sup>2+</sup>                                            | 28.88                                |
| Solvent                                                     | 28.44                                |
| Ramachandran analysis <sup>f</sup>                          |                                      |
| % residues (favoured regions)                               | 98.8                                 |
| % residues (allowed regions)                                | 100.0                                |

<sup>a</sup>The crystallization drops comprised 1 μL each of the protein, ligand and reservoir solutions; <sup>b</sup>Values in parentheses correspond to the highest resolution shell; <sup>c</sup> $R_{\text{merge}} = \frac{\sum_{hkl} \sum_i |I_i(hkl) - \langle I(hkl) \rangle|}{\sum_{hkl} \sum_i I_i(hkl)}$ ; <sup>d</sup>root mean square deviation; <sup>e</sup>calculated from the *B* values of all non-hydrogen atoms; <sup>f</sup>calculated with Molprobity.

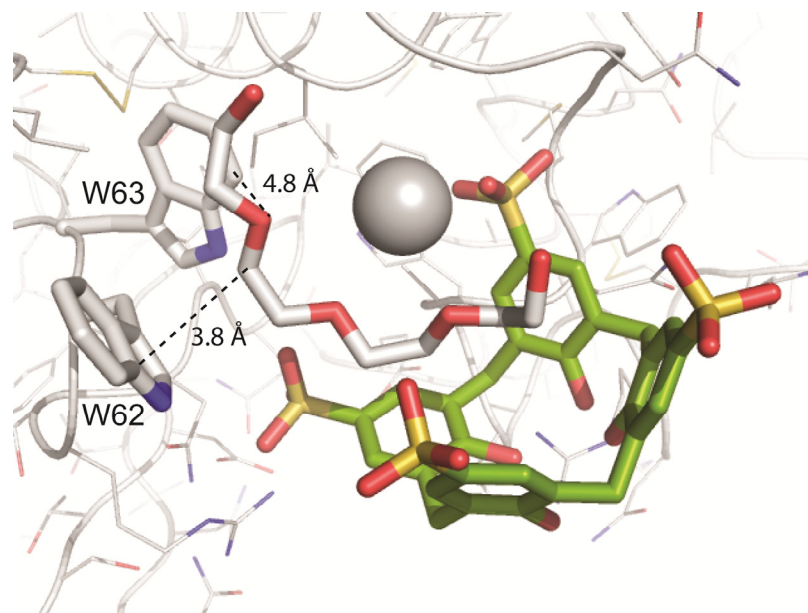

**Fig S1.** A calixarene bound near the active site in chain B. This calixarene is complexed with  $\text{Mg}^{2+}$  and a fragment of PEG (in a crown ether like conformation). The PEG also makes van der Waals contacts with the indole rings of the active site residues Trp62 and Trp63.

## References

1. R. E. McGovern, H. Fernandes, A. R. Khan, N. P. Power and P. B. Crowley, *Nat. Chem.* 2012, **4**, 527.
2. A. G. W. Leslie, Recent changes to the MOSFLM package for processing film and image plate data; Joint CCP4 + ESF-EAMCB Newsletter on Protein Crystallography **1992**.
3. P. Evans, *Acta Crystallogr. D.* 2006, **62**, 72.
4. A. J. McCoy, R. W. Grosse-Kunstleve, P. D. Adams, M. D. Winn, L. C. Storoni and R. J. Read. *J. Appl. Crystallogr.* 2007, **40**, 658.
5. Collaborative Computational Project, N. *The CCP4 suite: programs for protein crystallography.*; *Acta Crystallogr. D* 1994, **50**, 760.
6. P. Emsley, and K. Cowtan, *Acta Crystallogr. D.* 2004, **60**, 2126.
7. E. J. van Asselt, A. Perrakis, K. H. Kalk, V. S. Lamzin and B. W. Dijkstra, *Acta Crystallogr. D.* 1998, **54**, 58.
8. V. B. Chen, W. B. Arendall, J. J. Headd, D. A. Keedy, R. M. Immormino, G. J. Kapral, L. W. Murray, J. S. Richardson and D. C. Richardson, *Acta Crystallogr. D* 2010, **66**, 12.
9. E. Krissinel, and K. Henrick, *J. Mol. Biol.* 2007, **372**, 774.
